# Supplementary material for: Effects of Inulin-Based Prebiotics Alone or in Combination with Probiotics on Human Gut Microbiota and Markers of Immune System: A Randomized, Double-Blind, Placebo-Controlled Study in Healthy Subjects
Source: MDPI journal article supplement (doi:10.3390/microorganisms10061256), 2022-06-20
Supplement: s1 [file s1]

**Table S3** List of the species-specific primers used in this study for qPCR analysis (adjusted from Mezzasalma et al., 2015).

| Probiotic                               | Primer code | Sequence (5'→ 3')      | DNA region | Amplified length (bp) |
|-----------------------------------------|-------------|------------------------|------------|-----------------------|
| <i>L. plantarum</i>                     | Lpl2F       | CATTGGAACCGAACCAGTTG   | 16S/23S IS | 203 bp                |
|                                         | LpL2R       | CGGTGTTCTCGGTTTCATTATG |            |                       |
| <i>L. acidophilus</i>                   | Lacid2F     | GGGCAAATCACGAACGAGTA   | pre16S     | 132 bp                |
|                                         | Lacid2R     | CTTTGTTTTCGTTCGCTTCA   |            |                       |
| <i>B. animalis</i> subsp. <i>lactis</i> | AnimF       | GCACGGTTTTGTGGCTGG     | pre 16S    | 171 bp                |
|                                         | AnimR       | GACCTGGGGGACACACTG     |            |                       |
