# Supplementary material for: Effects of Inulin-Based Prebiotics Alone or in Combination with Probiotics on Human Gut Microbiota and Markers of Immune System: A Randomized, Double-Blind, Placebo-Controlled Study in Healthy Subjects
Source: MDPI journal article supplement (doi:10.3390/microorganisms10061256), 2022-06-20
Supplement: s1 [file s1]

**Table S2.** Composition and characteristics of prebiotics in the administered formulations used in this study.

| Fiber selected for the study | Description                                                                  |
|------------------------------|------------------------------------------------------------------------------|
| FOS                          | 50 mg of fructo-oligosaccharides with a degree of polymerization between 3-5 |
| Inulin 90%                   | 50 mg of inulin from chicory with a degree of polymerization of 10           |
