# Supplementary material for: Effects of Inulin-Based Prebiotics Alone or in Combination with Probiotics on Human Gut Microbiota and Markers of Immune System: A Randomized, Double-Blind, Placebo-Controlled Study in Healthy Subjects
Source: MDPI journal article supplement (doi:10.3390/microorganisms10061256), 2022-06-20
Supplement: s1 [file s1]

**Table S5** Pairwise difference test on the *alpha*-diversity of A, B, and D groups in the different intervals of time (T0 - T28, T0 - T56, and T28 - T56) using Wilcoxon signed-rank test.

| Group            | W (Wilcoxon signed-rank test) | p-value | FDR p-value |
|------------------|-------------------------------|---------|-------------|
| <b>T0 - T28</b>  |                               |         |             |
| A                | 93.0                          | 0.103   | 0.155       |
| B                | 81.0                          | 0.230   | 0.230       |
| D                | 66.0                          | 0.085   | 0.155       |
| <b>T0 - T56</b>  |                               |         |             |
| A                | 69.0                          | 0.020   | 0.061       |
| B                | 58.0                          | 0.045   | 0.068       |
| D                | 100.0                         | 0.590   | 0.590       |
| <b>T28 - T56</b> |                               |         |             |
| A                | 136.0                         | 0.476   | 0.692       |
| B                | 125.0                         | 0.692   | 0.692       |
| D                | 50.0                          | 0.002   | 0.007       |
